# Supplementary material for: Robust Vaccine-Induced as Well as Hybrid B- and T-Cell Immunity across SARS-CoV-2 Vaccine Platforms in People with HIV
Source: PubMed Central journal article supplement (PMC10269828; doi:10.1128/spectrum.01155-23), 2023-05-11
Supplement: reviewer-comments.pdf [file reviewer-comments.pdf]

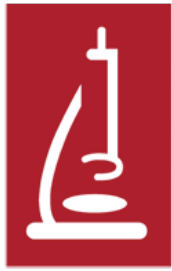

AMERICAN  
SOCIETY FOR  
MICROBIOLOGY

# Microbiology Spectrum

## Robust vaccine-induced as well as hybrid B- and T-cell immunity across SARS-CoV-2 vaccine platforms in people with HIV

Myrthe Verburgh, Lisa van Pul, Marloes Grobben, Anders Boyd, Ferdinand Wit, Ad van Nuenen, Karel van Dort, Khadija Tejjani, Jacqueline van Rijswijk, Margreet Bakker, Lia van der Hoek, Maarten Schim van der Loeff, Marc van der Valk, Marit van Gils, Neeltje Kootstra, and Peter Reiss

*Corresponding Author(s): Myrthe Verburgh, Amsterdam UMC Locatie AMC*

---

### Review Timeline:

Submission Date:

March 20, 2023

Accepted:

April 22, 2023

---

*Editor: Oliver Laeyendecker*

*Reviewer(s): Disclosure of reviewer identity is with reference to reviewer comments included in decision letter(s). The following individuals involved in review of your submission have agreed to reveal their identity: Yanmin Wan (Reviewer #1)*

### Transaction Report:

(Note: With the exception of the correction of typographical or spelling errors that could be a source of ambiguity, letters and reports are not edited. The original formatting of letters and referee reports may not be reflected in this compilation.)

DOI: <https://doi.org/10.1128/spectrum.01155-23>

April 22, 2023

Dr. Myrthe Lauriëtte Verburgh  
Amsterdam UMC Locatie AMC  
Infectious Diseases  
Meibergdreef 9  
Amsterdam  
Netherlands

Re: Spectrum01155-23 (Robust vaccine-induced as well as hybrid B- and T-cell immunity across SARS-CoV-2 vaccine platforms in people with HIV)

Dear Dr. Myrthe Lauriëtte Verburgh:

Your manuscript has been accepted, and I am forwarding it to the ASM Journals Department for publication. You will be notified when your proofs are ready to be viewed.

The ASM Journals program strives for constant improvement in our submission and publication process. Please tell us how we can improve your experience by taking this quick [Author Survey](#).

**Publication Fees:** We have partnered with Copyright Clearance Center to collect author charges. You will soon receive a message from no-reply@copyright.com with further instructions. For questions related to paying charges through RightsLink, please contact Copyright Clearance Center by email at [ASM\\_Support@copyright.com](mailto:ASM_Support@copyright.com) or toll free at +1.877.622.5543. Hours of operation: 24 hours per day, 7 days per week. Copyright Clearance Center makes every attempt to respond to all emails within 24 hours. For a complete list of **Publication Fees**, including supplemental material costs, please visit our [website](#).

ASM policy requires that data be available to the public upon online posting of the article, so please verify all links to sequence records, if present, and make sure that each number retrieves the full record of the data. If a new accession number is not linked or a link is broken, provide production staff with the correct URL for the record. If the accession numbers for new data are not publicly accessible before the expected online posting of the article, publication of your article may be delayed; please contact the ASM production staff immediately with the expected release date.

Corresponding authors may [join or renew ASM membership](#) to obtain discounts on publication fees. Need to upgrade your membership level? Please contact Customer Service at [Service@asmusa.org](mailto:Service@asmusa.org).

Thank you for submitting your paper to Spectrum.

Sincerely,

Oliver Laeyendecker  
Editor, Microbiology Spectrum

Journals Department  
American Society for Microbiology  
1752 N St., NW  
Washington, DC 20036  
E-mail: [spectrum@asmusa.org](mailto:spectrum@asmusa.org)
